# Supplementary material
Source: publisher figshare collection journal article supplement (https://tandf.figshare.com/articles/dataset/_/11472678)
Supplement: Supplementary file 1 [file 1]

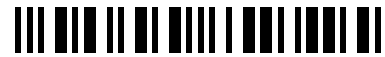

**Welcome to our project entitled: Understanding the use of Head-Mounted Devices: The case of eSight**

**The purpose of this research project consists in studying how you use your eSight device, and identifying which factors are related to your use.**

**As one of the 1000+ users of these eSight Eyewear, we would like to collect information about your quality of life, your satisfaction and your experience.**

**This study is conducted by the University of Montreal and is funded by MITACS, a national, not-for profit research organization that manages and funds research and training programs in partnership with universities, industry and Government in Canada.**

**This funding partnership involves eSight Corporation, the manufacturer of eSight eyewear.**

**It takes less than an hour to complete the survey and you will have a month to do so. This is a one-time on-line survey. Indeed, once the survey is completed your participation in this study is ended.**

**This survey will take less than an hour and will include different parts to complete regarding: I) Quality of life; II) Satisfaction; and III) The usage patterns of your eSight device.**

**Potential risks of this study**

**There are no known or anticipated risks associated with this project.**

**It should be noted that participation in this survey is not intended to affect your use of eSight device. The participants are encouraged to continue their normal usage of their device.**

**Advantages of this study**

**This study does not lead to a direct benefit to participants. However, the information obtained from it could be useful for the improvement of portable video devices for**

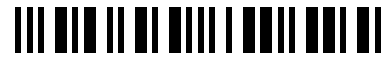

## Section A: Demographic condition

**A1. Age**

|  |  |  |  |  |  |  |  |  |  |
|--|--|--|--|--|--|--|--|--|--|
|  |  |  |  |  |  |  |  |  |  |
|--|--|--|--|--|--|--|--|--|--|

**A2. Gender**

Female ☐

Male ☐

**A3. Are you currently a car driver?**

Yes ☐

No ☐

**A4. City**

|  |
|--|
|  |
|--|

**A5. Country**

|  |
|--|
|  |
|--|

**A6. Subject's employment/study situation**

Employed Outside of Home ☐

Employed at Home ☐

Unemployed ☐

Full Time Student ☐

Part Time Student ☐

Retired ☐

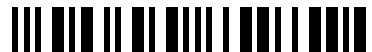

**A7. Subject's accomodations**

- House ☐
- Apartment ☐
- Townhouse ☐
- Living/Retirement Community ☐
- Nursing Home ☐
- Mobile home ☐
- Other ☐

Other

**A8. Subjects living arrangement**

- Alone ☐
- With spouse/companion ☐
- With young children ☐
- With adult children ☐
- With sibling or other relatives ☐
- With parents ☐
- With guardian ☐
- Other ☐

Other

**A9. Level of study**

- Elementary School (up to 8th grade) ☐
- Secondary school (completion of high school) ☐
- Postsecondary school (university) ☐

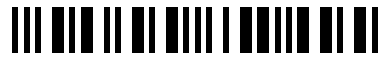

Section B: Health condition

**B1. Do you have a restriction of your visual field?**

Central field loss (I can not see clearly what is in front of me so I need to enlarge, and I see better using the sides of my vision)

Peripheral field loss (I do not see clearly on the sides of my vision but I see more clearly what is in front of me)

Both (I can not see clearly what is in front of me so I need to enlarge, and I do not see clearly on the sides of my vision)

None

**B2. What is your ocular diagnosis?**

Retinal detachment

Diabetic Retinopathy

Retinopathy of Prematurity

Stargardt’s Disease

Age Related Macular Degeneration

Leber’s Disease

Glaucoma

Ocular Albinism

Cone Rod Dystrophy

Choroideremia

Other

Other

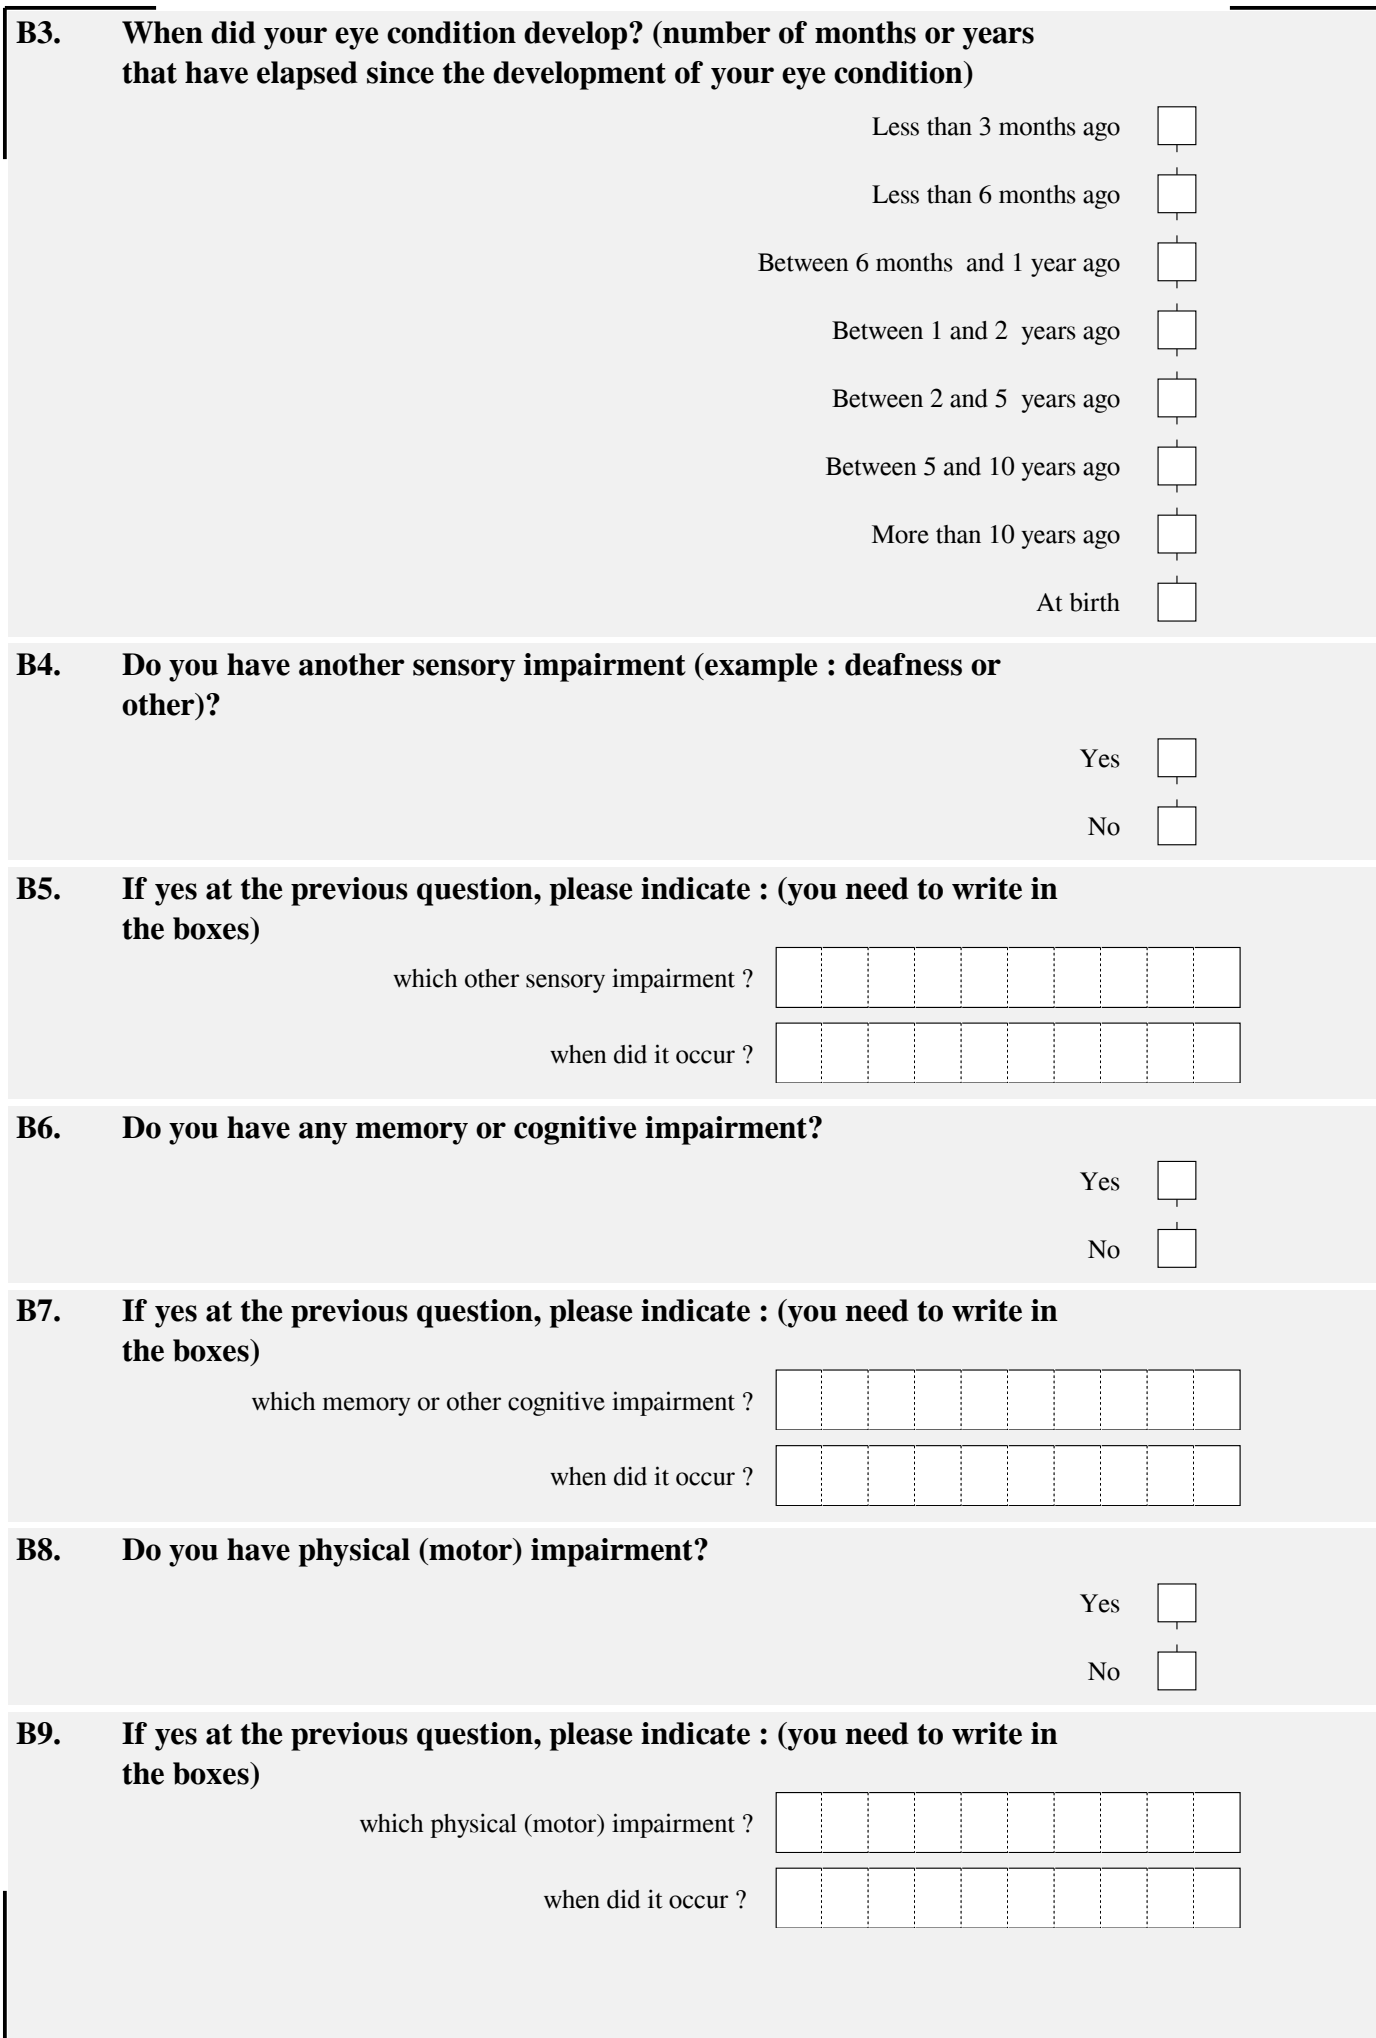

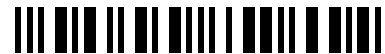

**B10. In general, would you say that your overall health is :**

|           |                          |
|-----------|--------------------------|
| Excellent | <input type="checkbox"/> |
| Very good | <input type="checkbox"/> |
| Good      | <input type="checkbox"/> |
| Fair      | <input type="checkbox"/> |
| Poor      | <input type="checkbox"/> |

**B11. Compared to 3 months ago, would you say that your overall health is :**

|                                           |                          |
|-------------------------------------------|--------------------------|
| Much better now than three months ago     | <input type="checkbox"/> |
| Somewhat better now than three months ago | <input type="checkbox"/> |
| About the same                            | <input type="checkbox"/> |
| Somewhat worse now than three months ago  | <input type="checkbox"/> |
| Much worse now than three months ago      | <input type="checkbox"/> |

**B12. During the 3 past months, have you had any of the following problems with your work or other regular daily activities as a result of your physical health (unrelated to your vision loss)?**

|                                                                                            | Yes                      | Uncertain                | No                       |
|--------------------------------------------------------------------------------------------|--------------------------|--------------------------|--------------------------|
| Cut down the amount of time you spent on work or other activities                          | <input type="checkbox"/> | <input type="checkbox"/> | <input type="checkbox"/> |
| Accomplished less than you would like                                                      | <input type="checkbox"/> | <input type="checkbox"/> | <input type="checkbox"/> |
| Were limited in the kind of work or other activities                                       | <input type="checkbox"/> | <input type="checkbox"/> | <input type="checkbox"/> |
| Had difficulty performing the work or other activities (for example, it took extra effort) | <input type="checkbox"/> | <input type="checkbox"/> | <input type="checkbox"/> |

**B13. During the 3 past months, have you had any of the following problems with your work or other regular daily activities as a result of any emotional problems (such as feeling depressed or anxious)?**

|                                                                   | Yes                      | Uncertain                | No                       |
|-------------------------------------------------------------------|--------------------------|--------------------------|--------------------------|
| Cut down the amount of time you spent on work or other activities | <input type="checkbox"/> | <input type="checkbox"/> | <input type="checkbox"/> |
| Accomplished less than you would like                             | <input type="checkbox"/> | <input type="checkbox"/> | <input type="checkbox"/> |
| Did not do work or other activities as carefully as usual         | <input type="checkbox"/> | <input type="checkbox"/> | <input type="checkbox"/> |

**B14. During the 3 past weeks,**

|                                      | All of the time          | Most of the time         | A good bit of the time   | Some of the time         | None of the time         |
|--------------------------------------|--------------------------|--------------------------|--------------------------|--------------------------|--------------------------|
| Did you have a lot of energy?        | <input type="checkbox"/> |
| Have you been a very nervous person? | <input type="checkbox"/> |

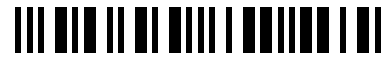

|                                     | All of the time          | Most of the time         | A good bit of the time   | Some of the time         | None of the time         |
|-------------------------------------|--------------------------|--------------------------|--------------------------|--------------------------|--------------------------|
| Have you felt calm and peaceful?    | <input type="checkbox"/> |
| Have you felt downhearted and blue? | <input type="checkbox"/> |
| Did you feel worn out?              | <input type="checkbox"/> |
| Did you feel tired?                 | <input type="checkbox"/> |

## Section C: PART I : Quality of Life

The purpose of this part is to evaluate how satisfied you are with your eSight Eyewear and the related services you received. The questionnaire consists of 12 satisfaction items.

For each of the 12 items, rate your satisfaction with your eSight Eyewear and the related services you received by using the following scale graduated from "not satisfied at all" to "very satisfied".

Please select the field that best describes your degree of satisfaction with each of the 12 items.

Do **not** leave any question unanswered.

### C1. Regarding your eSight Eyewear...

How satisfied are you with,

|                                                                                  | Not satisfied at all     | Not very satisfied       | More or less satisfied   | Quite satisfied          | Very satisfied           |
|----------------------------------------------------------------------------------|--------------------------|--------------------------|--------------------------|--------------------------|--------------------------|
| the dimensions (size, height, length, width) of your eSight?                     | <input type="checkbox"/> |
| the weight of your eSight?                                                       | <input type="checkbox"/> |
| the ease in adjusting (fixing, fastening) the parts of your eSight?              | <input type="checkbox"/> |
| how safe and secure your eSight is?                                              | <input type="checkbox"/> |
| the durability (endurance, resistance to wear) of your eSight?                   | <input type="checkbox"/> |
| how easy it is to use your eSight?                                               | <input type="checkbox"/> |
| how comfortable your eSight is?                                                  | <input type="checkbox"/> |
| how effective your eSight is (the degree to which your device meets your needs)? | <input type="checkbox"/> |

### C2. Regarding services...

How satisfied are you with,

|                                                                                              | Not satisfied at all     | Not very satisfied       | More or less satisfied   | Quite satisfied          | Very satisfied           |
|----------------------------------------------------------------------------------------------|--------------------------|--------------------------|--------------------------|--------------------------|--------------------------|
| the service delivery program (procedures, length of time) in which you obtained your eSight? | <input type="checkbox"/> |

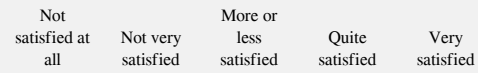

Dimensions

Weight 

|  |
|--|
|  |
|--|

Adjustments

|        |  |
|--------|--|
| Safety |  |
|--------|--|

Durability 

|  |
|--|
|  |
|--|

Easy to use ☐

Comfort ☐

|               |  |
|---------------|--|
| Effectiveness |  |
|---------------|--|

Service delivery ☐Repairs/servicing ☐Professional service ☐

|                    |  |
|--------------------|--|
| Follow-up services |  |
|--------------------|--|

**D1. Each word or phrase below describes how using an assistive device may affect you. Some may seem unusual but it is important that you answer every one of the 26 items. So, for each word or phrase please select the appropriate box to show how you are affected by using your eSight Eyewear. The boxes are graduated from "-3" (the level you feel affected decreases) and "+3" (the level you feel affected increases).**

-3      -2      -1      0      +1      +2      +3

1. Competence



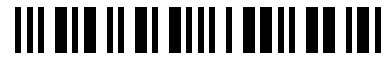

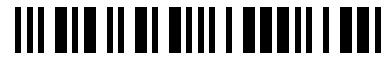

-3      -2      -1      0      +1      +2      +3

26. Ability to take advantage of opportunities    ☐ ..... ☐ ..... ☐ ..... ☐ ..... ☐ ..... ☐ ..... ☐

## Section E: PART III : How you currently use your eSight Eyewear

### E1.      Step 1: You and your eSight device

Which eSight device version do you own?

eSight 2 (bought before April 2017)    ☐

eSight 3 (bought after April 2017)    ☐

### E2.      When did you buy the eSight device?

Less than 3 months ago    ☐

Between 3 and 6 months ago    ☐

Between 6 and 12 months ago    ☐

Between 12 and 18 months ago    ☐

Between 18- and 24 months ago    ☐

More than 24 months ago    ☐

### E3.      When did you start using your eSight device?

Less than 3 months ago    ☐

Between 3 and 6 months ago    ☐

Between 6 and 12 months ago    ☐

Between 12 and 18 months ago    ☐

Between 18 and 24 months ago    ☐

More than 24 months ago    ☐

### E4.      If you started to use it more than 1 month after the purchase, please explain why in the box below?

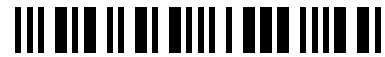

**E5. What is your frequency of utilization?**

- Everyday ☐
- Between 2 and 3 a week ☐
- Between 4 and 5 a week ☐
- Once a week ☐
- Between 2 and 3 a month ☐
- Between 4 and 5 a month ☐
- Once a month ☐
- Less than once a month ☐

**E6. What is the average consecutive time of your eSight device utilization?**

- Less than half an hour ☐
- Between 30 minutes and 1 hour ☐
- Between 1 and 2 hours ☐
- Between 2 and 4 hours ☐
- Between 4 and 8 hours ☐
- More than 8 hours ☐

**E7. When did you use your eSight device the last time?**

- Today ☐
- Less than a week ago ☐
- During the past 4 weeks ☐
- Between 2 and 3 months ago ☐
- More than 3 months ago ☐

**E8. If you did not use it for more than 3 months, please explain why in the box below?**

**E9. What is the nature of tasks for which the eSight device was purchased? (Check all that apply)**

- Watching TV ☐

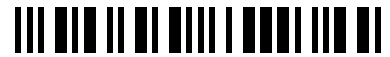

Reading books, Newspaper print, Typed letter... ☐

Shopping ☐

Getting around ☐

Using my computer ☐

Watching events (sports, church, theatre, etc...) ☐

Cooking ☐

Personal care (washing, makeup, etc...) ☐

Socializing with others ☐

Meetings, classrooms, etc... ☐

Other ☐

Other

**E10. What is the nature of tasks for which the eSight device is actually used?**

Watching TV ☐

Reading books, Newspaper print, Typed letter... ☐

Shopping ☐

Getting around ☐

Using my computer ☐

Watching events (sport, church, theatre, etc...) ☐

Cooking ☐

Personal care (washing, makeup, etc...) ☐

Socializing with others ☐

Meetings, classrooms, etc... ☐

I do not use my eSight device anymore. ☐

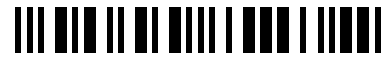

Other

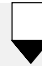

Other

**E11. What are the most effective activities for which you use the eSight device? (you need to write in the box below)**

**E12. For which activities is the eSight device not effective or useful? (you need to write in the box below)**

**E13. What activities are you disappointed the eSight device does not help you accomplish? (you need to write in the box below)**

**E14. How much is each of the following symptoms affecting you while or just after using the eSight?**

|                    | None                     | Slight                   | Moderate                 | Severe                   |
|--------------------|--------------------------|--------------------------|--------------------------|--------------------------|
| General discomfort | <input type="checkbox"/> | <input type="checkbox"/> | <input type="checkbox"/> | <input type="checkbox"/> |
| Headache           | <input type="checkbox"/> | <input type="checkbox"/> | <input type="checkbox"/> | <input type="checkbox"/> |
| Eyestrain          | <input type="checkbox"/> | <input type="checkbox"/> | <input type="checkbox"/> | <input type="checkbox"/> |
| Nausea             | <input type="checkbox"/> | <input type="checkbox"/> | <input type="checkbox"/> | <input type="checkbox"/> |

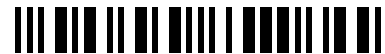

None      Slight      Moderate      Severe

Vertigo      ☐ ..... ☐ ..... ☐ ..... ☐

Dizziness eyes open      ☐ ..... ☐ ..... ☐ ..... ☐

Dizziness eyes closed      ☐ ..... ☐ ..... ☐ ..... ☐

Vomiting      ☐ ..... ☐ ..... ☐ ..... ☐

**E15.    STEP 2: eSight user's characteristics**

**Have you ever used an electronic video  
magnifier other than electronic eyewear (head-mounted display)?**

Yes      ☐

No      ☐

**E16.    Have you ever used another type of electronic eyewear (head-mounted display) other than the eSight device?**

Yes      ☐

No      ☐

**E17.    If you have used another type of electronic eyewear (head-mounted display) other than the eSight device, please indicate (you need to write in the box following each question) :**

Which one(s)?      ☐

How often?      ☐

Why did you stop to use it?      ☐

**E18.    Do you currently use several low vision aids?**

Yes      ☐

No      ☐

**E19.    If your are using several low vision aids, please indicate which :**

Table-top video magnifier      ☐

Hand-held video magnifier      ☐

Magnifier software      ☐

Special glasses      ☐

Hand-held telescope for distance      ☐

Hand-held optical magnifier for reading      ☐

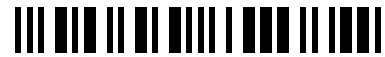

Smartphone or tablet computer as low vision aid

☐

Cane

☐

Other

☐

Other

**E20. To what extent have you adapted to your visual handicap?**

Not at all

☐

Slightly

☐

Moderately

☐

Quit a bit

☐

Extremely

☐

**E21. During the 3 past months, to what extent has your visual condition worsened?**

Not at all

☐

Slightly

☐

Moderately

☐

Quit a bit

☐

Extremely

☐

Other

☐

Other

**E22. Do you enjoy using the eSight device?**

Not at all

☐

Slightly

☐

Moderately

☐

Quite a bit

☐

Extremely

☐

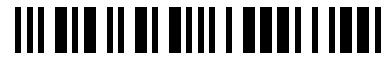

**E23. Regarding the previous question, explain why? (you need to write in the box below) (Optional)**

**E24. To what extent have you been disappointed using the eSight device?**

- Not at all ☐
- Slightly ☐
- Moderately ☐
- Quit a bit ☐
- Extremely ☐

**E25. Regarding the previous question, please explain why? (you need to write in the box below) (Optional)**

**E26. In general, to what extent do you think the eSight is right for you?**

- 0: Not at all ☐
- 1: Slightly ☐
- 2: Moderately ☐
- 3: Quit a bit ☐
- 4: Extremely ☐

**E27. To what extent do you think you have the ability to control your usage of the eSight?**

- 0: Not at all ☐
- 1: Slightly ☐
- 2: Moderately ☐
- 3: Quit a bit ☐
- 4: Extremely ☐



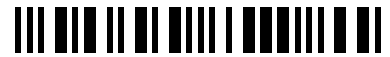

**E28. How did you finance the eSight device?**

- Self pay ☐
- Family ☐
- Donation ☐
- Public government ☐
- Agency ☐
- Borrowed ☐
- Rented ☐
- Other, please indicate : ☐
- Other ☐

Other

**E29. STEP 3: eSight use changes**

**To what extent do you consider you have integrated the eSight device into your life?**

- Not at all ☐
- Slightly ☐
- Moderately ☐
- Quit a bit ☐
- Extremely ☐

**E30. Regarding the previous question, what are the reasons? (you need to write in the box below) (Optional)**

**E31. Have you have completely stopped using the eSight device?**

- Yes ☐
- No ☐

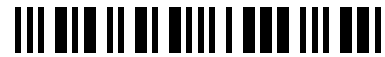

**E32. If you have completely stopped using the eSight device, please write in the box following each question :**

Since when?

What are the reasons? (optional)

**E33. Overall, do you now use the eSight device more or less than at the beginning?**

More

Less

Same

**E34. If you now use the eSight device less than at the beginning, please write in the box following each question :**

Since when?

What are the reasons? (optional)

**E35. Have you reduced using the eSight device for certain tasks?**

Yes

No

**E36. If you have reduced using the eSight device for certain tasks, please write in the box following each question :**

Since when?

What are the reasons? (optional)

**E37. Have you stopped using the eSight device for certain tasks?**

Yes

No

**E38. If you have stopped using the eSight device for certain tasks, please write in the box following each question :**

For which one?

Since when?

What are the reasons? (optional)

**E39. Do you use the eSight device for new tasks that you did not expect before buying?**

Yes

No

**E40. If you use the eSight device for new tasks that you did not expect before buying, please write in the box following each question :**

Since when?

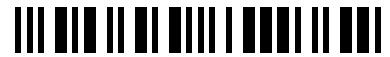

What are the reasons if any? ☐

**E41. Part 4: Social and physical environment**

**Who made the choice to buy your eSight device?**

Yourself ☐

Family, friends ☐

Clinician (Ophthalmologist, Optometrist, Specialist in low vision...) ☐

Other ☐

Other

**E42. Do your family or friends encourage you to wear the eSight device?**

All of the time ☐

Most of the time ☐

A good bit of the time ☐

Some of the time ☐

A little of the time ☐

None of the time ☐

**E43. Does your family help you to carry out activities of daily living?**

All of the time ☐

Most of the time ☐

A good bit of the time ☐

Some of the time ☐

A little of the time ☐

None of the time ☐

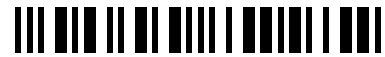

**E44. To what extent do you think that the majority of people that are close to you think you should use the eSight?**

0: Not at all ☐

1: Slightly ☐

2: Moderately ☐

3: Quit a bit ☐

4: Extremely ☐

**E45. Have elements in the physical environment (architecture, infrastructure, public transports,...) ever influenced your use of eSight?**

Yes ☐

No ☐

**E46. If you have elements in the physical environment that have ever influenced your use of eSight, please write which one in the box below :**

**E47. Have you ever felt a reaction from people around you towards your eSight device?**

Yes ☐

No ☐

**E48. If you have ever felt a reaction from people around you towards your eSight device, please write in the box following each question :**

The type of reaction? ☐

Has this reaction led to a change in the use of your eSight in a social setting? ☐

**E49. Have strangers ever asked you about your eSight device?**

Yes ☐

No ☐

No answer ☐

**E50. If yes, please write in the box following each question :**

If it was a positive or negative response? ☐

What were their and your reactions? ☐

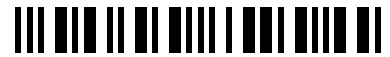

**E51. STEP 5: Training/Intervention**

**Have you received vision rehabilitation services?**

Yes ☐

No ☐

**E52. Who introduced you to the eSight device?**

Clinician (Ophthalmologist, Optometrist, Specialist in low vision...) ☐

Family or friends ☐

Advertising, social media ☐

Associations ☐

Other ☐

Other

**E53. Would you have preferred it to be another person?**

Yes ☐

No ☐

**E54. If you would have preferred it to be another person, please indicate who?**

Clinician (Ophthalmologist, Optometrist, Specialist in low vision...) ☐

Family or friends ☐

Advertising, social media ☐

Associations ☐

Other ☐

Other

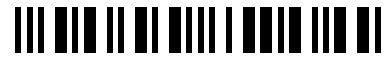

**E55. If you would you have preferred it to be another person, what are the reasons? (please write in the box below) (optional)**

**E56. Regarding the training program proposed by eSight (eSkills), to what extent would you consider it helpful?**

Very useful ☐  
Moderately useful ☐  
Slightly useful ☐  
Not useful ☐

**E57. Can you explain your choice regarding the "helpful" aspect? (Please write in the box below) (Optional)**

**E58. Regarding the training program proposed by eSight (eSkills), are you satisfied with this training program?**

Very satisfied ☐  
Satisfied ☐  
Moderately satisfied ☐  
Not satisfied at all ☐  
No answer ☐

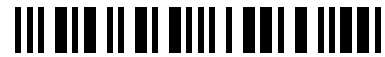

**E59. Can you please explain your choice regarding the satisfaction with this training program? (you need to write in the box below) (Optional)**

**E60. Have you completed the training program (eSkills)?**

Entirely ☐

Half ☐

More than the half ☐

Not at all ☐

**E61. If you have not entirely completed the training program, please explain why? (you need to write in the box below)**

**E62. Who or what contributed the most to your training, please write the reasons if any in the boxes following the items?**

Yourself ☐

Clinicians ☐

Professional from eSight ☐

eSkills program from eSight ☐

Family ☐

Friends ☐

Other, please indicate : ☐

**E63. Ideally, who or what should have contributed the most to your training, please write the reasons if any in the boxes following the items?**

Yourself ☐

Clinicians ☐

Professional from eSight ☐

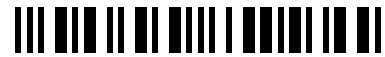

eSkills program from eSight ☐

Family ☐

Friends ☐

Other, please indicate : ☐

No answer ☐

**E64. Are you satisfied with the eSight device follow-up service?**

All of the time ☐

Most of the time ☐

A good bit of the time ☐

Some of the time ☐

A little of the time ☐

None of the time ☐

**E65. Is there anything else we did not ask you that you wish you would have asked you? (Please write in the box follow)**

Yes ☐

No ☐

**E66. If there is anything else we did not ask you that you wish we would have asked you, please write in the box below :**

**E67. You have the option of receiving a summary of the survey results once the study is complete, and including your name for a \$20 Starbucks gift card for your participation, as well as including your name in a draw for a \$100 Amazon gift card. Check all that apply, and enter your name and your e-mail address (if applicable) (This will not be utilized to link you to your individual survey response in any way.)**

I would like to receive a summary sheet of the survey results once the study is complete, my name and my e-mail address are (please write in the box) : ☐

I would like to receive a 20\$ Starbucks gift card for your participation and to be entered into a draw for a 100 dollars gift card (to Amazon store), my name and my e-mail address are (please write in the box if it has not already done) : ☐

**You have now completed all the questions, thank you for your participation.**
