# Supplementary material
Source: publisher figshare collection journal article supplement (https://tandf.figshare.com/articles/dataset/_/11472678)
Supplement: Supplementary file 2 [file 1]

Archive with 2 entries (2 files):
- idre_a_1704892_sm8146.pdf
- idre_a_1704892_sm8145.xlsx
