# Supplementary material
Source: publisher figshare collection journal article supplement (https://tandf.figshare.com/articles/dataset/_/11472678)
Supplement: Supplementary file 2 [file 1 › idre_a_1704892_sm8145.xlsx]

## Sheet: Feuil1
Supporting Information Table S1- Grouping of the 94 questions of the survey into the four "families" and selecting questions for logistic regression analyses
Personal factors
1	Age
2	Gender
3	Are you currently a car driver?
4	City
5	Country
6	Subject’s employment/study situation
7	Subject’s accomodations
8	Level of study
9	Do you have a restriction of your visual field?
10	What is your ocular diagnosis?
11	When did your eye condition develop? (number of months or years that have elapsed since the development of your eye condition)
12	Do you have another sensory impairment (example : deafness or other)?
13	If yes at the previous question, please indicate :
		which other sensory impairment ?
		when did it occur ?
14	Do you have any memory or cognitive impairment?
15	If yes at the previous question, please indicate :
		which memory or other cognitive impairment ?
		when did it occur ?
16	Do you have physical (motor) impairment?
17	If yes at the previous question, please indicate :
		which physical (motor) impairment ?
		when did it occur ?
18	In general, how is your overall health?
19	Compared to 3 months ago, how is your overall health?
20	During the 3 past months, have you had any of the following problems with your work or other regular daily activities as a result of your physical health (unrelated to your vision loss)?
21	During the 3 past months, have you had any of the following problems with your work or other regular daily activities as a result of any emotional problems (such as feeling depressed or anxious)?
22	During the 3 past weeks,
		Did you have a lot of energy?
		Have you been a very nervous person?
		Have you felt calm and peaceful?
		Have you felt downhearted and blue?
		Did you feel worn out?
		Did you feel tired?
23	PIADS questionnaire
24	When did you buy the eSight device?
25	When did you start using your eSight device?
26	If you started to use it more than 1 month after the purchase, please explain why?
27	What is your frequency of utilization?
28	What is the average consecutive time of your eSight device utilization?
29	When did you use your eSight device the last time?
30	If you did not use it for more than 3 months, please explain why?
31	What is the nature of tasks for which the eSight device was purchased? (Check all that apply)
32	What is the nature of tasks for which the eSight device is actually used?
33	What are the most effective activities for which you use the eSight device?
34	For which activities is the eSight device not effective or useful?
35	What activities are you disappointed the eSight device does not help you accomplish?
36	Have you ever used an electronic video magnifier other than electronic eyewear (head-mounted display)?
37	Have you ever used another type of electronic eyewear (headmounted display) other than the eSight device?
38	If you have used another type of electronic eyewear (head-mounted display) other than the eSight device, please indicate:
39	Do you currently use several low vision aids?
40	If your are using several low vision aids, please indicate which one(s).
41	To what extent have you adapted to your visual handicap?
42	During the 3 past months, to what extent has your visual condition worsened?
43	Do you enjoy using the eSight device?
44	Regarding the previous question, explain why? (you need to write in the box below) (Optional)
45	To what extent have you been disappointed using the eSight device?
46	Regarding the previous question, please explain why? (you need to write in the box below) (Optional)
47	In general, to what extent do you think the eSight is right for you?
48	To what extent do you think you have the ability to control your usage of the eSight?
49	How did you finance the eSight device?
50	To what extent do you consider you have integrated the eSight device into your life?
51	Regarding the previous question, what are the reasons? (Optional)
52	Have you have completely stopped using the eSight device?
53	If you have completely stopped using the eSight device, please write in the box following each question :
54	Overall, do you now use the eSight device more or less than at the beginning?
55	If you now use the eSight device less than at the beginning, please write in the box following each question :
		Since when?
		What are the reasons? (optional)
56	Have you reduced using the eSight device for certain tasks?
57	If you have reduced using the eSight device for certain tasks, please write in the box following each question :
		Since when?
		What are the reasons? (optional)
58	Have you stopped using the eSight device for certain tasks?
59	If you have stopped using the eSight device for certain tasks, please write in the box following each question :
		For which one?
		Since when?
		What are the reasons? (optional)
60	Do you use the eSight device for new tasks that you did not expect before buying?
61	If you use the eSight device for new tasks that you did not expect before buying, please write in the box following each question :
		Since when?
		What are the reasons if any?
Device related factors
62	Which eSight device version do you own?
63	QUEST questionnaire
64	How much general discomfort affecting you while or just after using the eSight?
65	How much headache affecting you while or just after using the eSight?
66	How much eyestrain affecting you while or just after using the eSight?
67	How much nausea affecting you while or just after using the eSight?
Social and physical environment factors
68	Subjects living arrangement
69	Who made the choice to buy your eSight device?
70	Do your family or friends encourage you to wear the eSight device?
71	Does your family help you to carry out activities of daily living?
72	To what extent do you think that the majority of people that are close to you think you should use the eSight?
73	Have elements in the physical environment (architecture, infrastructure, public transports,...) ever influenced your use of eSight?
74	If you have elements in the physical environment that have ever influenced your use of eSight, please write which one in the box below
75	Have you ever felt a reaction from people around you towards your eSight device?
76	If you have ever felt a reaction from people around you towards your eSight device, please write in the box following each question :
		The type of reaction?
		Has this reaction led to a change in the use of your eSight in a social setting?
77	Have strangers ever asked you about your eSight device?
78	If yes, please write in the box following each question :
		If it was a positive or negative response?
		What were their and your reactions?
Training/Intervention
79	Have you received vision rehabilitation services?
80	Who introduced you to the eSight device?
81	Would you have prefered it to be another person?
82	If you would have prefered it to be another person, please indicate who?
83	If you would you have prefered it to be another person, what are the reasons?
84	Regarding the training program proposed by eSight (eSkills), to what extent would you consider it helpful?
85	Can you explain your choice regarding the "helpful" aspect? (Optional)
86	Regarding the training program proposed by eSight (eSkills), are you satisfied with this training program?
87	Can you please explain your choice regarding the satisfaction with this training program?
88	Have you completed the training program (eSkills)?
89	If you have not entirely completed the training program, please explain why?
90	Who or what contributed the most to your training, please write the reasons if any?
91	Ideally, who or what should have contributed the most to your training, please write the reasons if any?
92	Are you satisfied with the eSight device follow-up service?
93	Is there anything else we did not ask you that you wish you would have asked you?
94	If there is anything else we did not ask you that you wish we would have asked you, please write in the box:
	included in the analyses because based on litterature or for explanatory reasons (independent variables)
	dependant variable for logistic regression analysis
	only for descriptiive statistics
	not included because did meet the requirements for logistic regression methods (incomplete information, complete separation, multicollinearity)
